# Supplementary material
Source: PubMed Central journal article supplement (PMC4115783)
Supplement: Supp_Figure1.pdf [file Supp_Figure1.pdf]

## Supplementary Data

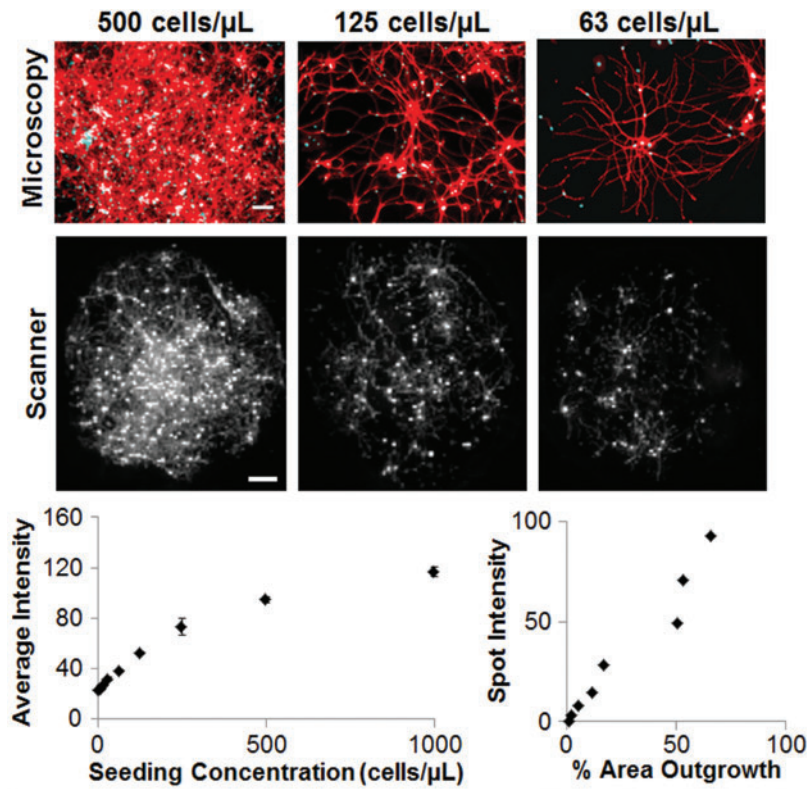

**SUPPLEMENTARY FIG. S1.** Neuron sensitivity array. Beta-III-tubulin- (red) and DAPI- (blue) positive neurons increase with increasing seeding density on a two-dimensional (2D) laminin array as identified by fluorescent microscopy and flatbed scanner. A positive correlation between both imaging modalities indicates that the scanner is sensitive to neurite density in 2D. Scale bar = 200  $\mu\text{m}$ . DAPI, 4',6-diamidino-2-phenylindol.
